# Supplementary material
Source: Royal Society of Chemistry journal article supplement (doi:10.1039/d6ta00836d)
Supplement: d6ta00836d1.pdf [file d6ta00836d1.pdf]

## Supplementary Information

### Phosphorus-doped hard carbon derived from waste PET bottles as a superior anode material for lithium-ion batteries

Dossym Yeskozha<sup>1</sup>, Aisha Zhanaikhan<sup>1,2</sup>, Aizhuz Sarsengaliyeva<sup>1,2</sup>, Yergali Mustafa<sup>3</sup>, Zumabay Bakenov<sup>1,4,5</sup>, Aliya Mukanova<sup>1,4\*</sup>, Arailym Nurpeissova<sup>1,4\*</sup>

<sup>1</sup>Institute of Batteries LLP, 53 Kabanbay Batyr Ave., Astana, 010000, Kazakhstan

<sup>2</sup>L.N. Gumilyov Eurasian National University, 2 Satpayeva St., Astana, 010000, Kazakhstan

<sup>3</sup>Almaty University of Power Engineering and Telecommunications, 126 Baitursynov St., Almaty, 050057, Kazakhstan

<sup>4</sup>Institute of New Materials and Energy Technologies PI, 53 Kabanbay Batyr Ave., Astana 010000, Kazakhstan

<sup>5</sup>Nazarbayev University, 53 Kabanbay Batyr Ave., Astana 010000, Kazakhstan

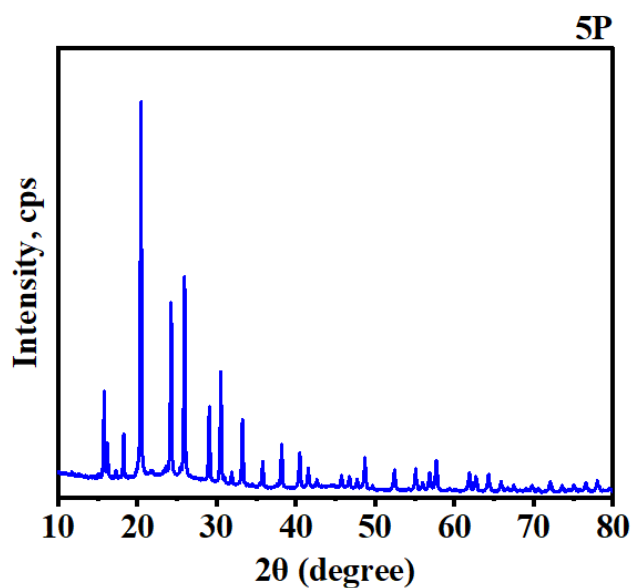

Figure S1. XRD pattern of the 5P sample.

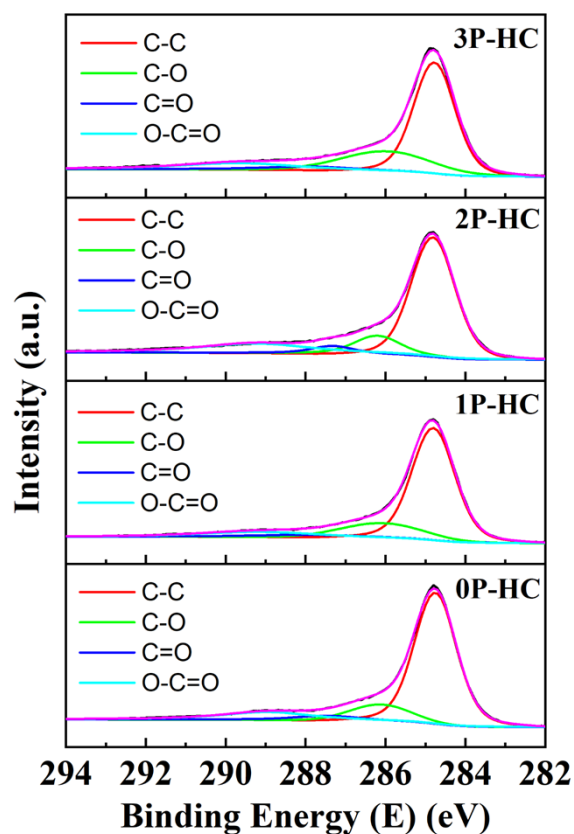

**Figure S2.** High-resolution C 1s XPS spectra of 0P-HC, 1P-HC, 2P-HC, and 3P-HC samples showing peak fitting for C–C, C–O, C=O, and O–C=O bonds.

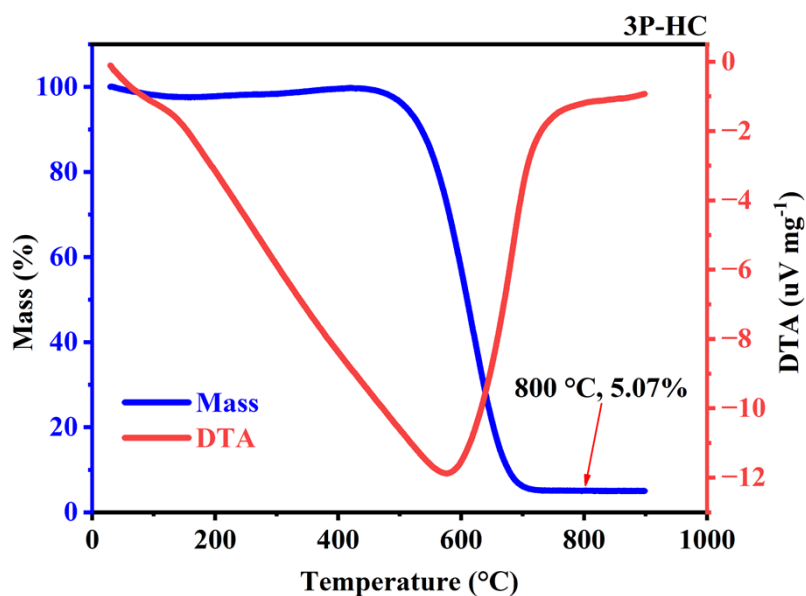

**Figure S3.** TGA of 3P-HC in air (ash determination)

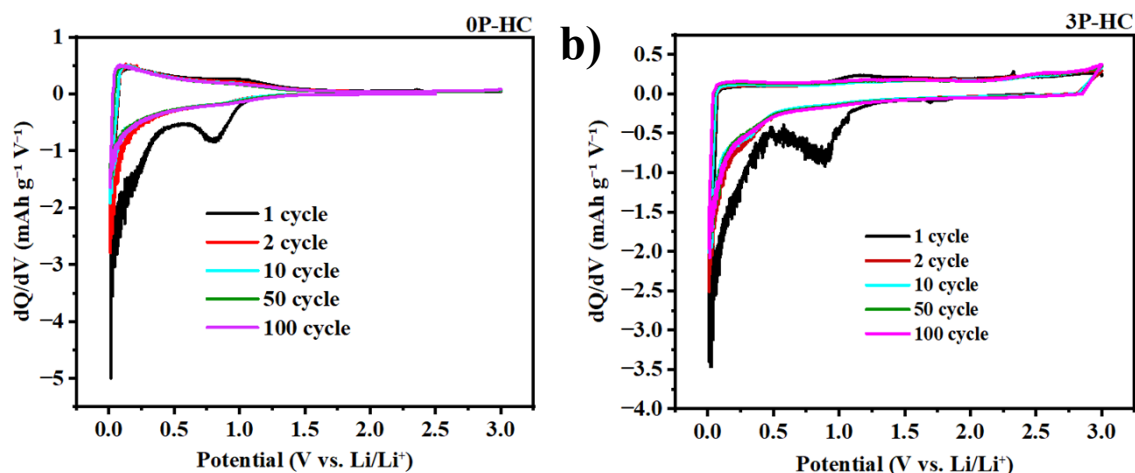

**Figure S4.** Differential capacity ( $dQ/dV$ ) profiles of (a) 0P-HC and (b) 3P-HC electrodes at selected cycles obtained from galvanostatic charge–discharge measurements.

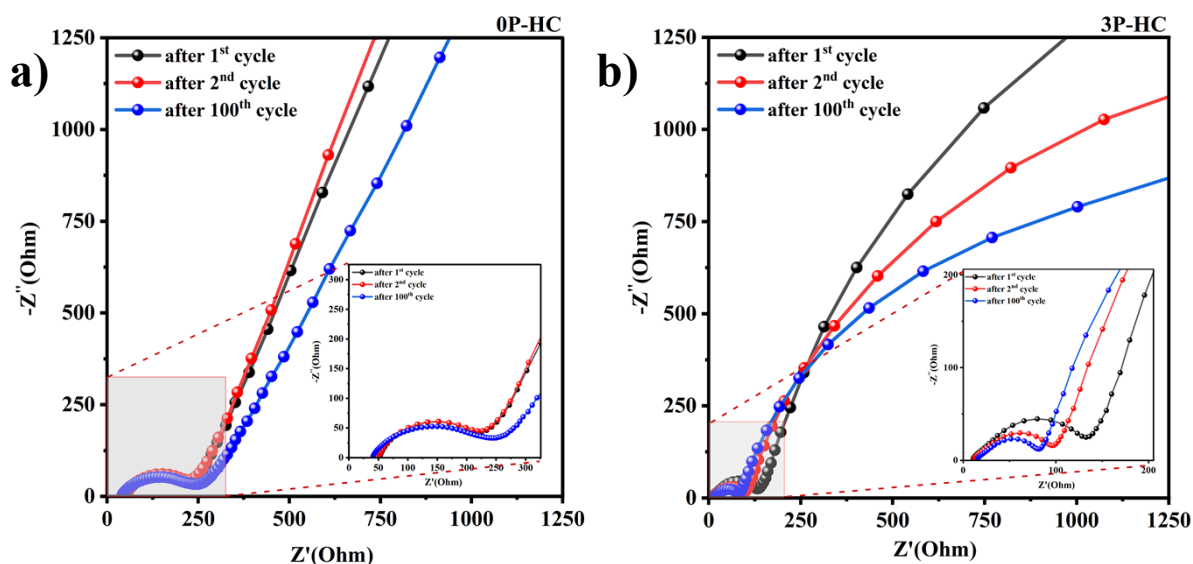

**Figure S5.** PEIS Nyquist plots of (a) 0P-HC and (b) 3P-HC electrodes recorded after 1<sup>st</sup>, 2<sup>nd</sup>, 100<sup>th</sup> cycles

**Table S1.** Electrical conductivity and resistivity of pristine and P-doped PET-derived hard carbon samples obtained from Hall measurements.

| Sample | Conductivity (S/cm) | Resistivity ( $\Omega \cdot \text{cm}$ ) |
|--------|---------------------|------------------------------------------|
| 0P-HC  | 47.90               | 3.665                                    |
| 1P-HC  | 71.67               | 2.172                                    |
| 2P-HC  | 104.04              | 1.088                                    |
| 3P-HC  | 206.69              | 0.490                                    |
| 5P-HC  | 74.36               | 1.354                                    |
